# Supplementary material for: The different serum albumin assays influence calcium status in haemodialysis patients: a comparative study against free calcium as a reference method
Source: publisher site journal article supplement (doi:10.1515/cclm-2024-1030), 2024-12-13

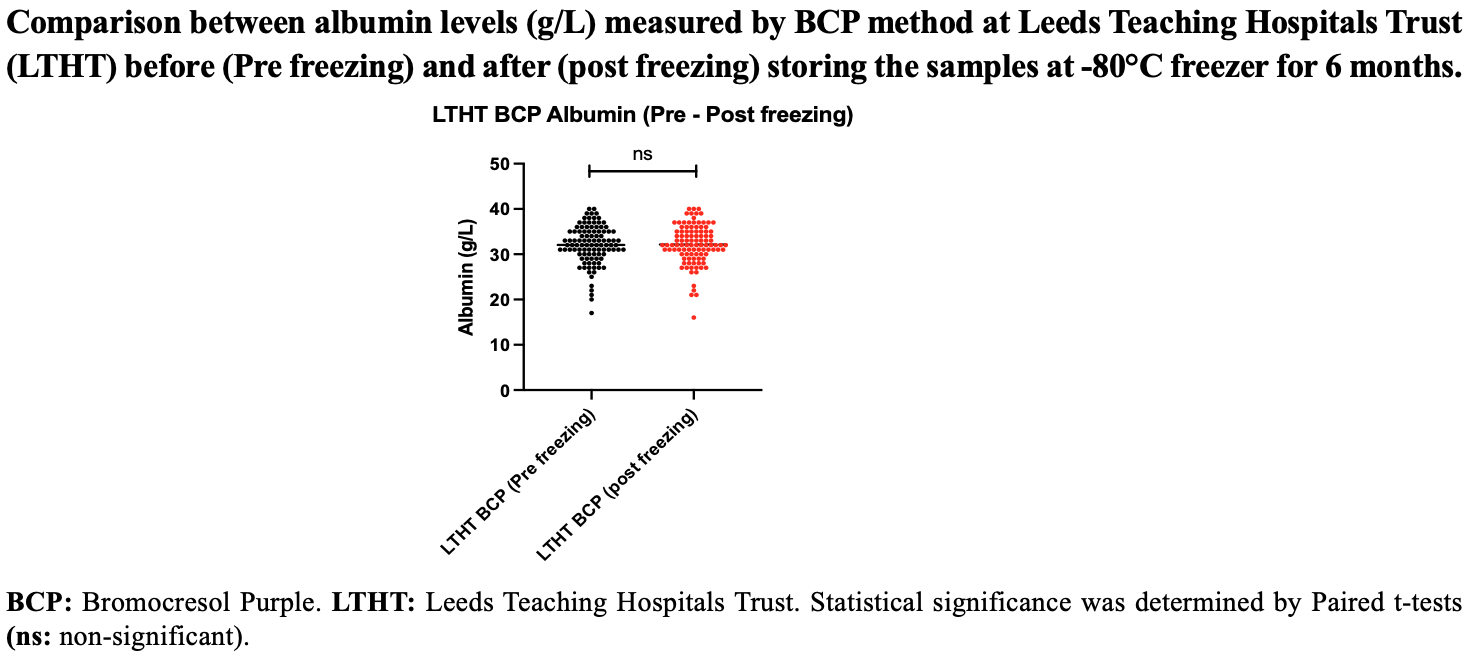
**Supplementary Figure 1** (LTHT BCP Albumin pre- / post- freezing)

**Supplementary Figure 2**: Shows that albumin immunoassays (either immunometricor nephelometric) are not widely available in the UK, and certainly they are not routinely used by hospital-based laboratories as evidenced by the UK National External Quality Assurance Scheme (NEQAS).


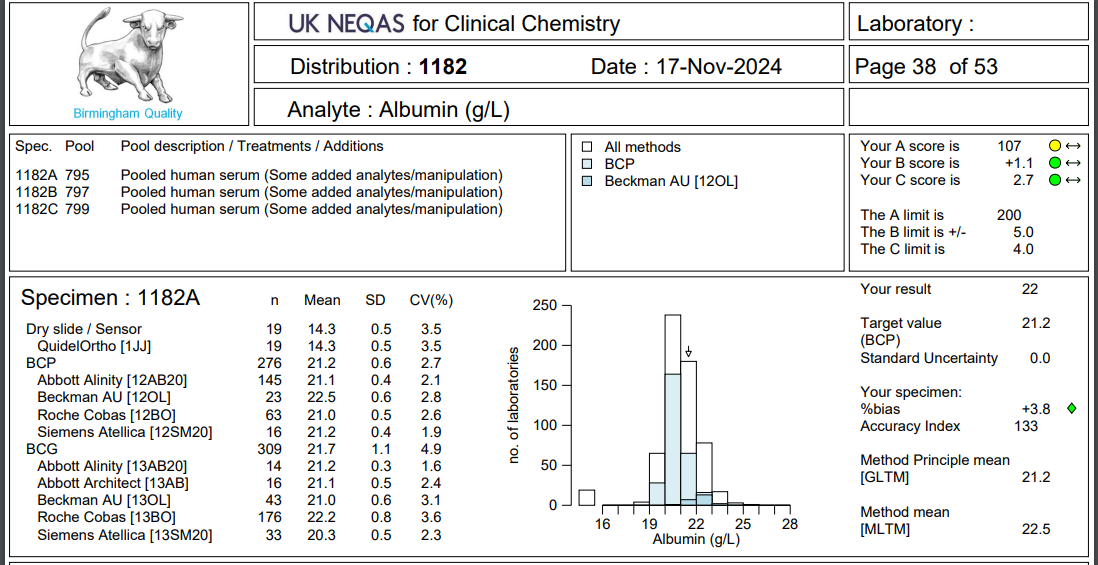

Supplement: Supplementary file 1 [file j_cclm-2024-1030_suppl_001.docx]
